## Strand Break Formation in Plasmid DNA Irradiated in Aqueous Solution: Effect of Medium Temperature and Hydroxyl Radical Scavenger Concentration

HIROYUKI TOMITA, MICHIAKI KAI, TOMOKO KUSAMA  
and YOSHIRO AOKI

Department of Radiological Health, Faculty of Medicine, University of Tokyo,  
7-3-1 Hongo, Bunkyo-ku, Tokyo 113, Japan

(Received, January 5, 1995)

(Revision received, February 16, 1995)

(Accepted, February 24, 1995)

### plasmid DNA/strand break/aqueous solution/temperature/lifetime of hydroxyl radical

Plasmid pBR322 DNA (4363 base pairs) in aerobic aqueous solution was irradiated with  $^{60}\text{Co}$   $\gamma$ -radiation. The change of diffusion coefficients ( $D$ ) of chemical species, rate constants ( $k$ ) of radical-DNA interaction and solubilities of  $\text{O}_2$  in water cannot be ignored when a temperature varies more than a few tens of centigrade. It is important to examine the variation of the yields of DNA strand breaks as a function of temperature in order to analyze the mechanisms of DNA strand breaks from the chemical point of view. Hence, we observed the change of the yield of strand breaks with temperatures between  $-20$  and  $42^\circ\text{C}$  by agarose gel electrophoresis. We also observed the change of the yield of strand breaks with the concentration of OH scavenger (Tris) from  $1\text{ mmol dm}^{-3}$  to  $100\text{ mmol dm}^{-3}$  and summarized it with previous experiments. This summarization indicated that the order of the lifetime of OH radical in cellular environment is several nanosecond. This value is consistent with the measurement of the lifetime of 8.7 nanosecond for OH radical in mammalian cell (Roots, R. and Okada, S. (1975) Radiat. Res. 64, 306–320).

## INTRODUCTION

It is widely accepted that many biological effects of ionizing radiation are a consequence of DNA damage. The quantitative analysis of DNA damage induced by low-LET radiation is important to progress the research of radiation biology and protection. DNA strand breaks induced by low-LET radiation in the cellular environment are mainly caused by reactions with diffusible hydroxyl radicals (OH) generated from water radiolysis<sup>1,2</sup>, but cellular systems are too complicated to analyze mechanisms of DNA strand breaks in detail. Small circular DNA are more useful for studying the effect of various physico-chemical reactions on DNA. Above all, plasmids are a convenient model system since they are of a well defined size, and the detection

of strand breaks is readily accomplished by gel electrophoresis. Several experiments using plasmid were reported<sup>2-8</sup>). However, these reported values of DNA strand breaks were mostly based on only three pieces of experimental data. The previous data were thought to be limited and insufficient for comparing them with analytical calculation.

The decrease in the mobility of molecules followed by a decline in the rate constant of chemical reactions is an obvious consequence of cooling. The temperature dependence of diffusion coefficients ( $D$ ) of chemical species, rate constants ( $k$ ) of radical-DNA interaction and solubilities of  $O_2$  in water can be estimated by Arrhenius equation. For example, the  $k$  of the self-recombination of  $e_{aq}^-$  ( $e_{aq}^- + e_{aq}^- \rightarrow H_2 + 2OH^-$ ) at  $42^\circ C$  is about ten times higher than at  $-10^\circ C$  (the activation energy is  $22.6 \text{ kJ/mol}^9$ ). These changes of  $D$  and  $k$  reflect molecular-level interactions. From the chemical point of view, variation of the yields of DNA strand breaks as a function of temperature cannot be ignored in analyzing the mechanisms of DNA strand breaks. For this reason, we examined temperature effects on the OH-attack to DNA in liquid-phase water ( $-20 \sim 42^\circ C$ ). These temperatures were closely related to the activity of creatures. The competition kinetics between DNA and OH can be altered by changing the ratio of OH-radical-scavenger concentration and DNA concentration. Thus, we also studied the effect of the concentration of OH-scavenger and compared it with the previous studies<sup>2,3,7,8,10,11</sup>). In these studies, radical scavengers were added prior to irradiation. This is because the competition kinetics between DNA and OH assumed to be constant throughout radiation exposure. We checked this assumption by a preliminary experiment that radical scavenger (Tris) was injected in the mid-point of irradiation period. If the competition are kept constant throughout exposure, just half number of strand breaks are observed.

We have been studying the mechanisms of OH-induced DNA strand breaks by computer simulation using track-structure approach of microdosimetry<sup>12</sup>). This experimental data of plasmid DNA will give us useful information to refine our computer simulation of physico-chemical process of the radiation-induced DNA strand break.

## MATERIALS AND METHODS

### DNA and Irradiation

pBR322 plasmid DNA (4363 base pairs, molecular weight about  $2.8 \times 10^6$  dalton) was obtained from GIBCO BRL. The plasmid DNA was suspended in TE solution. Solutions of

**Table 1.** Substances used to temperature experiment

| Substance                | Mixing amount [g]<br>(to 100 g ice) | Temperature [ $^\circ C$ ]<br>( $\pm 0.5^\circ C$ ) |
|--------------------------|-------------------------------------|-----------------------------------------------------|
| $MgSO_4 \cdot 7H_2O$     | 51.5                                | -3                                                  |
| $Na_2S_2O_3 \cdot 5H_2O$ | 67.5                                | -9                                                  |
| $NH_4Cl$                 | 25                                  | -13                                                 |
| $(NH_4)_2SO_4$           | 62                                  | -16                                                 |
| NaCl                     | 22.4                                | -20                                                 |

plasmid DNA ( $29.75 \mu\text{g}/\text{cm}^3$ ) were irradiated with  $^{60}\text{Co}$   $\gamma$ -ray aerobically in  $500 \mu\text{l}$  polypropylene tubes immersed in an ice bath at lower temperatures ( $-20$ ,  $-16$ ,  $-13$ ,  $-9$ ,  $-3$ , and  $0^\circ\text{C}$ ; Table 1) or in a warm bath at higher temperatures ( $20$ ,  $25$ ,  $36$ , and  $42^\circ\text{C}$ ) in the presence of OH scavenger (Tris, EDTA). We changed the concentration of Tris from  $1 \text{ mmol dm}^{-3}$  to  $100 \text{ mmol dm}^{-3}$ . The temperature of the bath was measured by thermocouple-thermometer (Techno Seven Co) both before and after irradiation. Solutions were made from water which was purified by filtering double distilled water through a MilliQ millipore system and solutes of analytical reagent grade. The values of the rate constants  $k$  for the reaction of scavenger with OH which were used for the calculation were: Tris<sup>13</sup>,  $1.5 \times 10^9 \text{ dm}^3 \text{ mol}^{-1} \text{ s}^{-1}$ ; EDTA<sup>3</sup>,  $1.2 \times 10^9 \text{ dm}^3 \text{ mol}^{-1} \text{ s}^{-1}$ . The irradiated doses were 6, 12.5, 25, 50, and 100 Gy. The dose-rates varied from 5.62 to 45.45 Gy/min. Within these ranges, the dose-rate had no effect on the yield of damage. The dose-rates were determined by Fricke dosimetry.

### Electrophoresis

Immediately after irradiation, the samples were mixed with 1/10 vol of a loading buffer [5% glycerol containing 0.25% Bromphenol Blue]. Supercoiled, open circular and linear forms of the plasmid were separated by agarose gel electrophoresis (Mupid-2, Cosmo Bio). The gels contained 1.4% agarose in TAE buffer ( $40 \text{ mmol dm}^{-3}$  Tris-acetic-acid,  $2 \text{ mmol dm}^{-3}$  EDTA, pH 8.1) and were run for 5 h at  $4.13 \text{ V/cm}$  at  $4^\circ\text{C}$ . Gels were photographed using a red filter, and the ethidium bromide fluorescence bands were quantified by scanning the negatives with a PDI-1D gel analysis scanner (Toyobo Co). The amount of DNA applied to the gel was  $0.19 \mu\text{g}$  on average, so that linear relationship between the amounts of DNA and the peak area multiplied by the optical density of film was obtained in our experiment, which is shown in Figure 1. To account for the lower binding constant of ethidium to supercoiled plasmid, relative to the open circular and linear conformations, intensities of supercoiled bands were multiplied

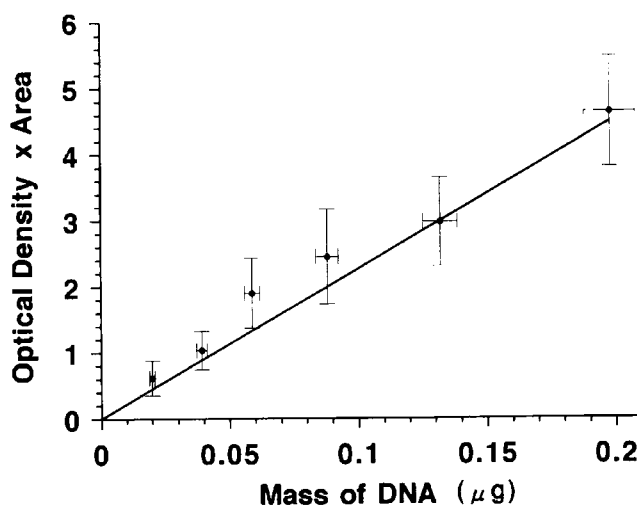

Fig. 1. Relationship between fluorescence intensity enhanced by EthBr and mass of plasmid pBR322 DNA

by factor 1.45 which was the average of two reported values for plasmid pBR322; 1.4<sup>7)</sup>, 1.5<sup>5)</sup>. The average number ( $x$ ) of SSBs and of the average number ( $y$ ) of DSBs per plasmid molecule were determined by the following equation<sup>4)</sup>.

$$x = \ln[(1-L)/S]$$

$$y = L/(1-L)$$

where  $S$  and  $L$  are the fractions of detectable molecules corresponding to supercoiled and linear form of the plasmid, respectively. To check the consistency of our data, DNA samples were irradiated by the same condition and the number of strand breaks were measured once a month and compared with each other through the period of our experiment.

#### *Timing of adding radical scavenger to sample*

10  $\mu$ l of Tris (1,10,100 mmol dm<sup>-3</sup>) was added to 40  $\mu$ l of the DNA medium (29.75  $\mu$ g/cm<sup>3</sup>

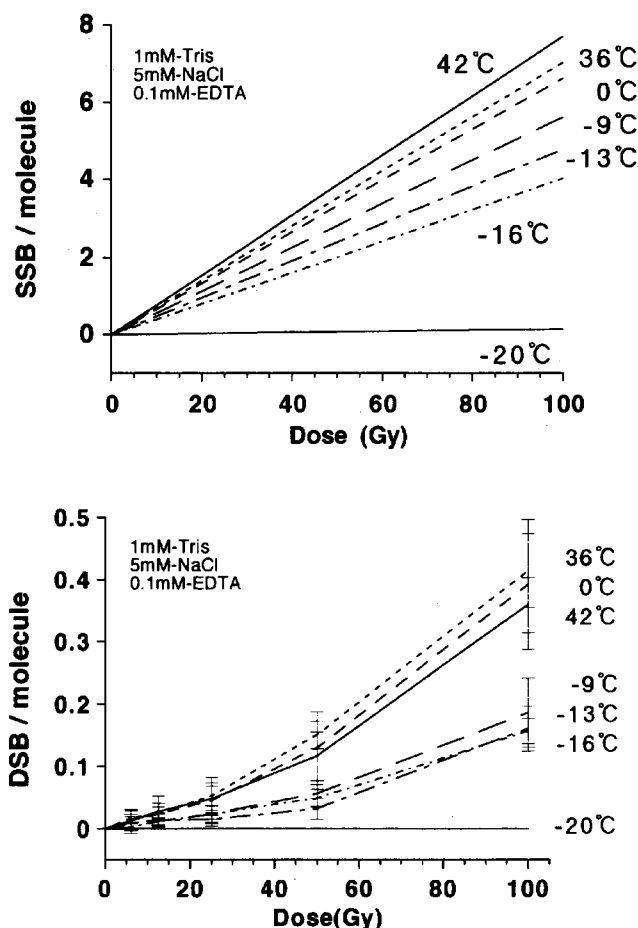

**Fig. 2.** The effects of temperature on the yields of SSBs and DSBs induced by  $^{60}\text{Co}$   $\gamma$ -ray in dilute aqueous solution (29.75  $\mu\text{g}/\text{cm}^3$  DNA, 1 mmol dm<sup>-3</sup> Tris, 5 mmol dm<sup>-3</sup> NaCl, 0.1 mmol dm<sup>-3</sup> EDTA)

DNA, 1 mmol dm<sup>-3</sup> Tris, 5 mmol dm<sup>-3</sup> NaCl, 0.1 mmol dm<sup>-3</sup> EDTA) at 10sec-, 2sec-before, or at the middle, or at 2sec-later, 10sec-later of the 50 Gy-exposure. Consequently, when Tris was injected in the middle of exposure, just half number of strand breaks were produced. The competition kinetics between DNA and OH were verified to be constant throughout radiation exposure. Hence, we added radical scavenger (Tris) prior to irradiation.

## RESULTS

### *The effects of temperature of medium*

The relation between the yield of radiation-induced strand breaks and temperature is shown in Figure 2. The number of SSBs increased linearly with the dose. The induction of DSBs was found to be a linear-quadratic function of the dose. A quarter of the samples in this study were observed to be frozen at  $-16^{\circ}\text{C}$  and all samples were frozen at  $-20^{\circ}\text{C}$ . The yields of SSBs of frozen samples at  $-16^{\circ}\text{C}$  was the same as those of  $-20^{\circ}\text{C}$  (no DSB was observed), so that frozen data of  $-16^{\circ}\text{C}$  (3 data) was not used for this plot. Each curve was obtained from twelve experiments (except  $-16^{\circ}\text{C}$ ), and the error-bars of SSBs were omitted for the simplicity of the figure. Figure 3 shows the effect of temperature on  $D_{37}$  of the yield of SSBs. The  $D_{37}$  doses were constant between  $-3^{\circ}\text{C}$  and  $36^{\circ}\text{C}$ , and increased with decreasing the temperature below  $-3^{\circ}\text{C}$ , and then it was amplified 30 times when the sample was frozen. The induction efficiencies for SSBs and DSBs as a function of temperature are shown in Figure 4. The yield of DSBs was not a linear function of radiation dose, so that induction efficiency of DSBs differs when calculated by either 50 Gy-data or 100 Gy-data. The yields of SSB and DSB induction were estimated  $10^{-8}/\text{Gy}/\text{dalton}$  and  $10^{-10}/\text{Gy}/\text{dalton}$ , respectively.

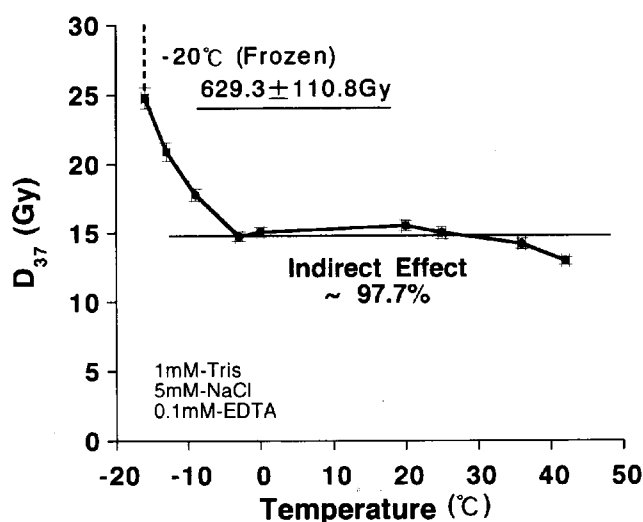

**Fig. 3.** The effects of temperature on  $D_{37}$  for plasmid pBR322 DNA in dilute aqueous solution ( $29.75 \mu\text{g}/\text{cm}^3$  DNA, 1 mmol dm<sup>-3</sup> Tris, 5 mmol dm<sup>-3</sup> NaCl, 0.1 mmol dm<sup>-3</sup> EDTA)

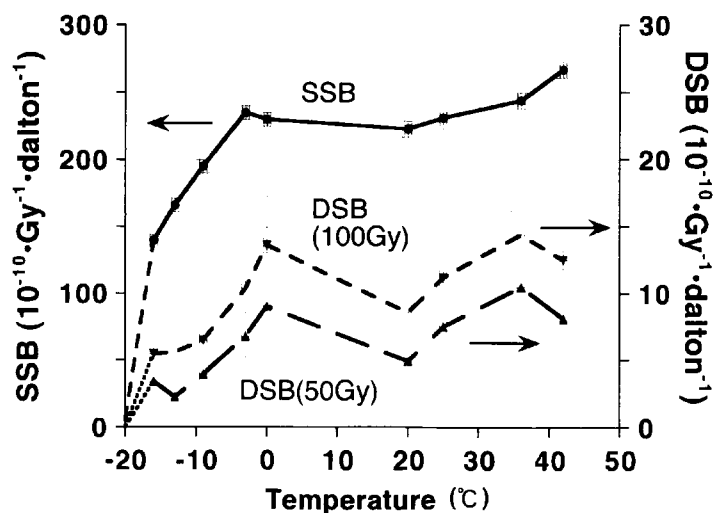

Fig. 4. The effects of temperature on the induction efficiencies for SSBs and DSBs by  $^{60}\text{Co}$   $\gamma$ -irradiation in dilute aqueous solution ( $29.75 \mu\text{g}/\text{cm}^3$  DNA,  $1 \text{ mmol dm}^{-3}$  Tris,  $5 \text{ mmol dm}^{-3}$  NaCl,  $0.1 \text{ mmol dm}^{-3}$  EDTA)

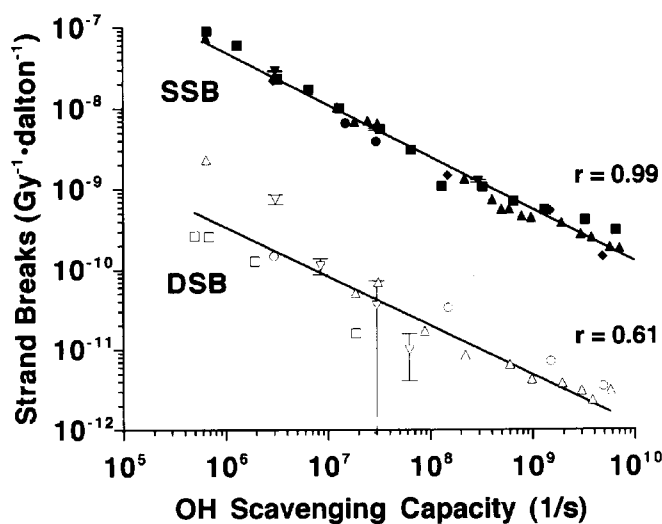

Fig. 5. Yield of single-strand breaks (SSBs) and one-hit double-strand breaks (aDSBs) after  $^{60}\text{Co}$   $\gamma$ -irradiation of small circular DNA. ( $\blacktriangle$  plasmid pBR322; ref.2,  $\blacksquare$  plasmid pUC18(2686 bp), pBR322; ref.7,  $\blacklozenge$  SV40( $\sim 5300$  bp); ref.10,  $\bullet$  pBR322; ref.11,  $\blacktriangledown$  pBR322; our data,  $\triangle$  pBR322; ref.2,  $\square$  pBR322; ref.4,  $\circ$  SV40; ref.10,  $\nabla$  pBR322; our data). The correlation coefficients ( $r$ ) are also shown.

#### The effects of the concentration of OH scavenger

A double-logarithmic plot of the SSB yield versus scavenging capacity ( $\sigma$ ) shows that the points fall approximately on a straight line (Figure 5, solid symbols) and the fitted curve was

(SSB) =  $3.79 \times 10^{-4} \cdot \sigma^{-0.648}$ . The yields of DSBs with linear and quadratic dependence on the dose were determined by plotting the total number of DSBs per unit dose versus the dose and extracting the values of the yield for  $\alpha$ DSBs from the intercept and those for  $\beta$ DSBs from the slope of the resulting straight line<sup>14)</sup>. A double-logarithmic plot of the  $\alpha$ DSB yields versus  $\sigma$  also showed that they decreased almost linearly (Figure 5, open symbols) and fitted curve was ( $\alpha$ DSB) =  $1.63 \times 10^{-6} \cdot \sigma^{-0.613}$ .

## DISCUSSION

### *Dose-effect relationship*

Our results showed a linear relation between the SSB production and the dose, and linear-quadratic relation between DSB production and the dose. These results were consistent with earlier studies of small circular DNA<sup>2,14–16)</sup>. On the contrary, linear dose-effect relation of DSBs in a cellular environment was reported<sup>17,18)</sup>. This linear relation was determined by pulsed-field gel electrophoresis (PFGE) carefully calibrated with Iodine-125 or restriction enzyme *NotI*. This contradiction might be due to high scavenging capacity in cellular environment. The reported induction efficiencies of DSBs were  $10^{-11}$  to  $10^{-12}$ /Gy/dalton in cellular environment<sup>17,18)</sup>. These values were equivalent to the scavenging capacity of  $10^9$  s<sup>-1</sup> in small-circular-DNA experiments (Figure 5). The lifetime of OH radical is the inverse of the scavenging capacity of the solution, so that OH-radicals in cells are probably scavenged in nanoseconds. Roots and Okada measured the lifetime for OH-radical in mammalian cell<sup>19)</sup>. This value (8.7 nanosecond) is consistent with the above estimation. Figure 2 shows that a 100 Gy-exposure was needed to observe a non-linear dose-effect relationship of DSBs even though the solution of dilute OH-radical scavenger (scavenging capacity is  $\sim 10^6$  s<sup>-1</sup>). Thus, a exposure of several thousands of Gy may be needed to observe a non-linear dose-effect relation of DSBs in cellular environment. This is because the concentration of OH-radical scavenger in cells (scavenging capacity is  $\sim 10^9$  s<sup>-1</sup>) is about one thousand times higher than our experimental condition (scavenging capacity is  $\sim 10^6$  s<sup>-1</sup>). The induction of SSB is thought to follow one-hit kinetics while that of DSB thought to shift gradually from having a major quadratic (two-hit) component at a very low scavenging capacity to nearly a pure linear (one-hit) for capacity  $> 10^7$  s<sup>-1</sup><sup>10)</sup>.

### *The contribution of the indirect effect of radiation*

If only “direct effect” of radiation induces strand breaks in frozen-phase, 98% of the strand breaks were estimated to be produced by “indirect effect” in our experiment, from the result of  $D_{37}$  of the yield of SSBs (Figure 3). This experimental result showed a good agreement with our previous calculation ( $98.5 \pm 2.5\%$ )<sup>12)</sup>. The above assumption is oversimplified one and indirect effect cannot be diminished in frozen phase<sup>20)</sup>. Moreover, the relative contribution to the strand breaks of this “direct” and “indirect effect” is still a basic problem in radiation biology. However, DNA strand breaks were formed principally by “indirect effect” in the solution of dilute OH-radical scavenger.

*The effects of medium temperature on DSB induction*

Simple relations between DSB induction and temperature were not observed in our experiment. The minimum of DSB induction between  $-3^{\circ}\text{C}$  and  $42^{\circ}\text{C}$  was measured at  $20^{\circ}\text{C}$ . The induction efficiency of DSBs at  $20^{\circ}\text{C}$  was six tenth of that of  $36^{\circ}\text{C}$  (Figure 4). Jones *et al.* reported that when the DNA was held at low temperature ( $<2^{\circ}\text{C}$ ) before and during electrophoresis, the measured yields of SSBs and DSBs were twofold less than in samples exposed to room temperature<sup>21)</sup>. In contrast, if the DNA was incubated at  $37^{\circ}\text{C}$  overnight, the yield of DSBs increased twofold over the room temperature assay, while the SSB yield increased only to a small extent ( $\leq 20\%$ )<sup>21)</sup>. However, we maintained all DNA samples at low temperatures before ( $\leq 2^{\circ}\text{C}$ ) and during ( $\leq 4^{\circ}\text{C}$ ) electrophoresis. So that, the effect of postirradiation-holding-temperature was irrelevant to our experiment. Collins suggested that DNA involving unrepaired lesion (e.g. SSB) had a high sensitivity of DSB<sup>22)</sup>. When non-irradiated plasmid DNA was analyzed by agarose gel electrophoresis, about 10% of them were observed in open circular form (no linear form was observed). Even a control DNA has SSBs and these initial-SSBs were thought to be left unrepaired in our experiment, because no repair enzymes were involved. The number of initial-SSB probably influenced the outcome, but no correlation was found between the ratio of open circular form of control plasmid and the number of radiation-induced DSBs. In order to progress the understanding of this phenomenon, the experimental work of neutron scattering<sup>23)</sup> for observing the change of clustering structures of  $\text{H}_2\text{O}$  molecules might be suggestive. Moreover, many authors<sup>e.g. 23,24)</sup> have detected anomalies in the temperature dependence of some physical properties of water at these temperatures ( $15\sim 30^{\circ}\text{C}$ ) and DSB was more sensitive than SSB to the change of temperature<sup>21)</sup>.

*The ratio of SSB/DSB*

The observed ratio of SSB/DSB was from  $23.9 \pm 4.8$  (based on 100-Gy data) to  $40.4 \pm 14.9$  (based on 50-Gy data) and almost independent of temperatures in our experiment. To explain these ratios, it is thought that two independently introduced SSBs in opposite strands results in a DSB. Several maximum distances between two SSBs that produce one DSB had been estimated by the curve fitting of the data of small circular DNA. The reported distances were widely distributed between 10 to 60 base pairs<sup>2,16,25,26)</sup>. However, 5~10 base pairs seem to be a more appropriate distance. These values were suggested by direct measurements by ESR<sup>27)</sup>, disintegration of  $^{32}\text{P}$  atoms incorporated in  $\lambda$  phage DNA<sup>28)</sup> and electron migration study in aqueous solution<sup>29)</sup>.

**ACKNOWLEDGEMENT**

We would like to thank Dr. K. Hieda for helpful discussions on the techniques of agarose gel electrophoresis. We would also thank Dr. D. Hiroishi for Fricke dosimetry.



## REFERENCES

1. von Sonntag, C. (1987) "Chemical Basis of Radiation Biology", Taylor & Francis, London.
2. Klimczak, U., Ludwig, D. C., Mark, F., Rettberg, P. and Schulte-Frohlinde, D. (1993) Irradiation of plasmid and phage DNA in water-alcohol mixtures: strand breaks and lethal damage as a function of scavenger concentration. *Int. J. Radiat. Biol.* **64**: 497–510.
3. Blazek, E. R. and Peak, M. J. (1988) The role of hydroxyl radical quenching in the protection by acetate and ethylenediaminetetraacetate of supercoiled plasmid DNA from ionizing radiation-induced strand breakage. *Int. J. Radiat. Biol.* **53**: 237–247.
4. Spotheim-maurizot, M., Charlier, M. and Sabbattier, R. (1990) DNA radiolysis by fast neutrons. *Int. J. Radiat. Biol.* **57**: 301–313.
5. Spotheim-maurizot, M., Franchet, J., Sabbattier, R. and Charlier, M. (1991) DNA radiolysis by fast neutrons. II. Oxygen, thiols and ionic strength effects. *Int. J. Radiat. Biol.* **59**: 1313–1324.
6. Ito, T., Baker, S. C., Stickley, C. D., Peak, J. G. and Peak, M. J. (1993) Dependence of the yield of strand breaks induced by  $\gamma$ -rays in DNA on the physical conditions of exposure: water content and temperature. *Int. J. Radiat. Biol.* **63**: 289–296.
7. Milligan, J. R., Aguilera, J. A. and Ward, J. F. (1993) Variation of single-strand break yield with scavenger concentration for plasmid DNA irradiated in aqueous solution. *Radiat. Res.* **133**: 151–157.
8. Milligan, J. R. and Ward, J. F. (1994) Yield of single-strand breaks due to attack on DNA by scavenger-derived radicals. *Radiat. Res.* **137**: 295–299.
9. Christensen, H., Sehested, K. and Logager, T. (1994) Temperature dependence of the rate constant for reactions of hydrated electrons with H, OH and  $\text{H}_2\text{O}_2$ . *Radiat. Phys. Chem.* **43**: 527–531.
10. Krisch, R. E., Flick, M. B. and Trumbore, C. N. (1991) Radiation chemical mechanisms of single- and double-strand break formation in irradiated SV40 DNA. *Radiat. Res.* **126**: 251–259.
11. Zheng, S., Newton, G. L., Ward, J. F. and Fahey, R. C. (1992) Aerobic radioprotection of pBR322 by Thiols: effect of thiol net charge upon scavenging of hydroxyl radicals and repair of DNA radicals. *Radiat. Res.* **130**: 183–193.
12. Tomita, H., Kai, M., Kusama T., Aoki, Y. and Ito, A. (1994) Monte Carlo simulation of DNA strand breaks induced by monoenergetic electrons using higher-order structure models of DNA. *Int. J. Radiat. Biol.* **66**: 669–682.
13. Buxton, G. V., Greenstock, C. L., Helman, W. P. and Ross, A. B. (1988) Critical review of rate constants for reactions of hydrated electrons, hydrogen atoms and hydroxyl radicals ( $\cdot\text{OH}/\cdot\text{O}^-$ ) in aqueous solution. *J. Phys. Chem. Ref. Data* **17**: 513–886.
14. Siddiqi, M. A. and Bothe, E. (1987) Single- and double-strand break formation in DNA irradiated in aqueous solution: dependence on dose and OH radical scavenger concentration. *Radiat. Res.* **112**: 449–463.
15. van der Schans, G. P., Bleichrodt, J. F. and Blok, J. (1973) Contributions of various types of damage to inactivation to a biologically-active double-strand circular DNA by gamma-radiation. *Int. J. Radiat. Biol.* **23**: 133–150.
16. Hempel, K. and Mildnerberger, E. (1987) Determination of G-values for single- and double-strand breaks induction in plasmid DNA using agarose gel electrophoresis and curve-fitting procedure. *Int. J. Radiat. Biol.* **52**: 125–138.
17. Ruiz de Almodovar, J. M., Steel, G. G., Whitaker, S. J. and McMillan, T. J. (1994) A comparison of methods for calculating DNA double-strand break induction frequency in mammalian cells by pulsed-field gel electrophoresis. *Int. J. Radiat. Biol.* **65**: 641–649.
18. Lobrich, M., Rydberg, B. and Cooper, P. K. (1994) DNA double-strand breaks induced by high-energy neon and iron ions in human fibroblasts. II. Probing individual *NotI* fragments by hybridization. *Radiat. Res.* **139**: 142–151.

19. Roots, R. and Okada, S. (1975) Estimation of life times and diffusion distances of radicals involved in X-ray-induced DNA strand breaks or killing of mammalian cells. *Radiat. Res.* **64**: 306–320.
20. Korystov, Yu. N. (1992) Contributions of the direct and indirect effects of ionizing radiation to reproductive cell death. *Radiat. Res.* **129**: 228–234.
21. Jones, G. D. D., Boswell, T. V. and Ward, J. F. (1994) Effects of postirradiation temperature on the yields of radiation-induced single- and double-strand breakage in SV40 DNA. *Radiat. Res.* **138**: 291–296.
22. Collins, A. (1987) Cellular responses to ionizing radiation: effects of interrupting DNA repair with chemical agents. *Int. J. Radiat. Biol.* **51**: 971–983.
23. Ohtomo, N., Tokiwano, K. and Arakawa, K. (1982) The structure of liquid water by neutron scattering. II. Temperature dependence of the liquid structure. *Bull. Chem. Soc. Jpn.* **55**: 2788–2795.
24. Peschel, G. and Adlfinger, K. H. (1971) Thermodynamic investigations of thin liquid layers between solid surfaces. II. Water between entirely hydroxylated fused silica surfaces. *Z. Naturforsch.* **26a**: 707–715.
25. van Touw, J. H., Berberne, J. B., Retel, J. and Loman, H. (1985) Radiation-induced strand breaks in  $\phi$ X174 replicative form DNA: an improved experimental and theoretical approach. *Int. J. Radiat. Biol.* **48**: 576–578.
26. Herskind, C. (1987) Single-strand breaks can lead to complex configurations of plasmid DNA *in vitro*. *Int. J. Radiat. Biol.* **52**: 565–575.
27. Boon, P. J., Cullis, P. M., Symons, M. C. R. and Wren B. W. (1984) Effect of ionizing radiation on deoxyribonucleic acid and related systems. Part 1. The role of oxygen. *J. Chem. Soc. Perkin Trans. II*: 1393–1399.
28. Tomizawa, J. and Ogawa, H. (1967) Breakage of polynucleotide strands by disintegration of radiophosphorus atoms in DNA molecules and their repair. II. Simultaneous breakage of both strands. *J. Mol. Biol.* **30**: 7–15.
29. Fuciarelli, A. F., Sisk, E. C. and Zimbrick, J. D. (1994) Electron migration in oligonucleotides upon  $\gamma$ -irradiation in solution. *Int. J. Radiat. Biol.* **65**: 409–418.
